# Supplementary material
Source: MDPI journal article supplement (https://www.mdpi.com/1996-1073/13/19/5200)
Supplement: s1 [file s1]

Supplementary Materials:

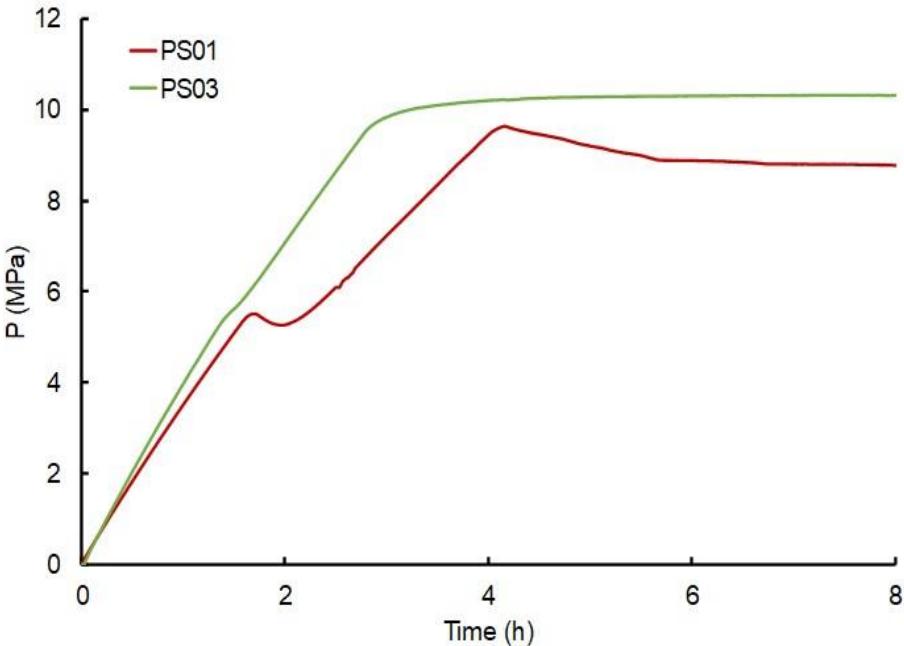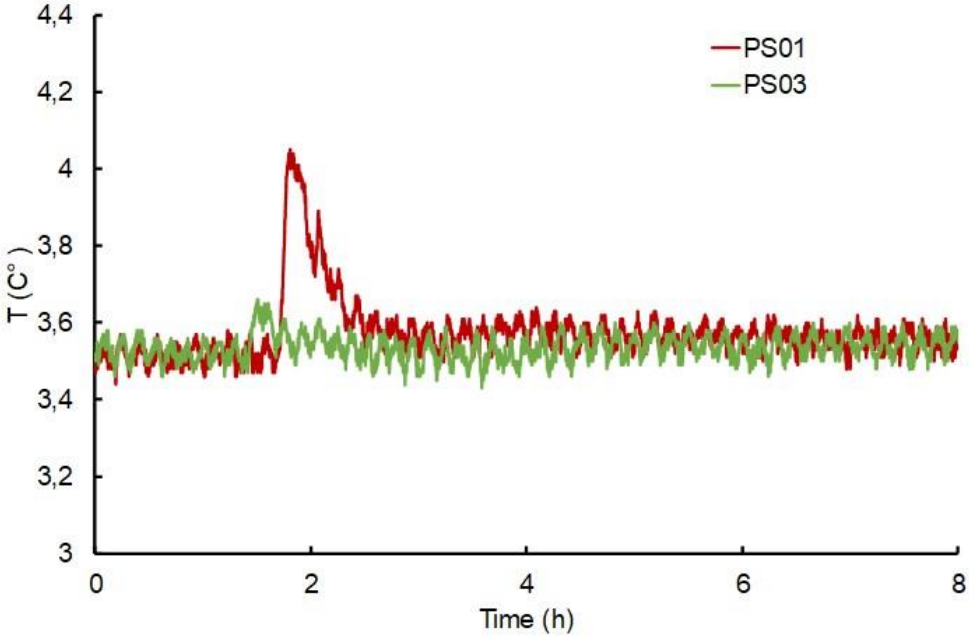

(a)

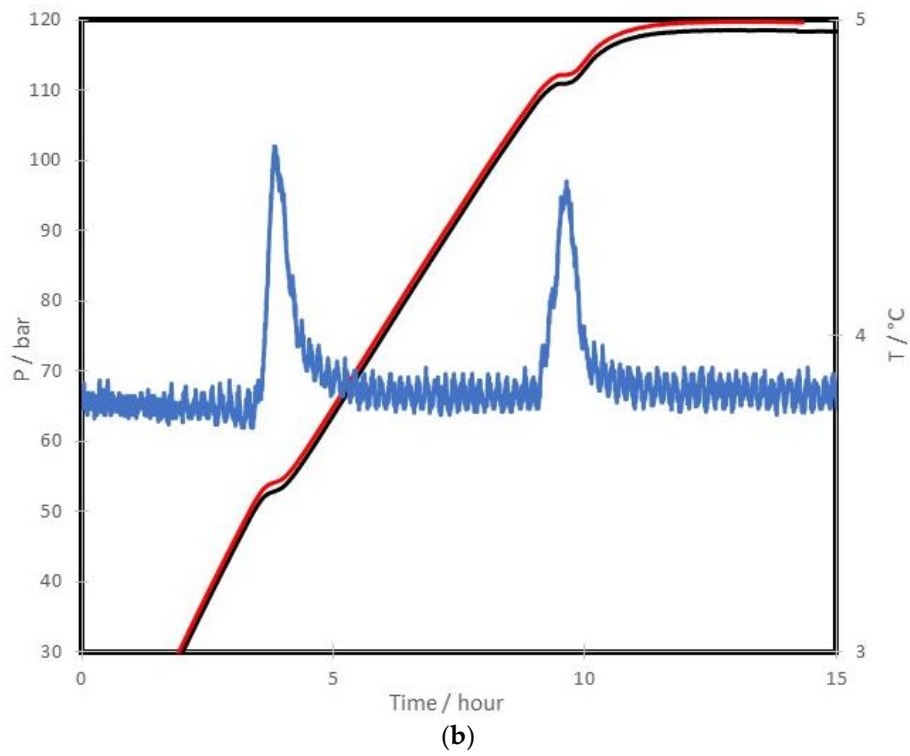

**Figure S1.** Pressure and temperature profiles during the first hours of methane hydrate formation and dissociation experiments around 53 % water saturation, and a gas flowrate of (a) 87 mln.min<sup>-1</sup> with different particle sizes and (b) 50 mln.min<sup>-1</sup> for non-sieved sand.
